# Supplementary material
Source: PubMed Central journal article supplement (PMC3480523)

## **Vitamin D deficiency, Smoking, and Lung Function in the Normative Aging Study**

Nancy E. Lange MD, MPH, David Sparrow DSc, Pantel Vokonas MD, Augusto A. Litonjua, MD, MPH

Online data supplement

For all tables, reference group for vitamin D deficiency (VDD) was the group of subjects without VDD, therefore negative effect estimates represent lower values in subjects with VDD compared to subjects without VDD.

**Table E1: Baseline characteristics of subjects included and not included in current analysis**

| Baseline (Time 1: 1984-89)    |                      |                         |          |
|-------------------------------|----------------------|-------------------------|----------|
|                               | included<br>(N=626)  | not included<br>(N=798) |          |
|                               | Mean (SD) or<br>N(%) | Mean (SD) or<br>N(%)    | p value* |
| Age                           | 59.9 (6.9)           | 65.3                    | <.0001   |
| BMI                           | 27.2 (3.3)           | 26.9 (3.6)              | 0.15     |
| FEV <sub>1</sub>              | 3.21 (0.63)          | 2.93 (0.66)             | <.0001   |
| FEV <sub>1</sub> %pred        | 89.5 (14.8)          | 86.8 (16.7)             | 0.001    |
| FVC                           | 4.24 (0.74)          | 3.89 (0.74)             | <.0001   |
| FVC %pred                     | 93.3 (12.8)          | 89.7 (14.3)             | <.0001   |
| FEV <sub>1</sub> /FVC ratio   | 75.5 (6.8)           | 75.1 (7.7)              | 0.35     |
| pack-years                    | 19.2 (22.3)          | 25.5 (27.0)             | <.0001   |
| current smoking<br>(N, % yes) | 64 (10%)             | 120 (15%)               | 0.008    |
| <b>GOLD</b>                   |                      |                         |          |
| 0                             | 528 (84%)            | 634 (79%)               |          |
| 1                             | 36 (6%)              | 44 (5.5%)               |          |
| 2                             | 53 (8%)              | 90 (11.3%)              |          |
| 3                             | 5 (1%)               | 16 (2%)                 |          |
| 4                             | 4 (0.5%)             | 14 (1.8%)               |          |

\* t-test or chi-sq

**Table E2: Cross-sectional analysis, main effects of Vitamin D deficiency in relation to lung function, at each of three time points (Time 1: 1984-89, Time 2: 1992-1999, Time 3: 1995-2003)**

Effect estimates ( $\beta$ ) are for vitamin D deficiency. Multivariable analysis includes adjustment for age, height, pack-years of smoking, BMI and season of blood draw.

|                  | Time 1  |         | Time 2  |         | Time 3  |         |
|------------------|---------|---------|---------|---------|---------|---------|
|                  | $\beta$ | p value | $\beta$ | p value | $\beta$ | p value |
| FEV <sub>1</sub> | -0.053  | 0.21    | -0.012  | 0.84    | -0.073  | 0.15    |
| FVC              | -0.029  | 0.53    | -0.1    | 0.11    | -0.045  | 0.42    |
| ratio            | -0.811  | 0.14    | 1.66    | 0.03    | -1.34   | 0.083   |

**Table E3: Bivariable and multivariable longitudinal models examining the main effect of vitamin D (both VDD and VDC) and lung function decline**

There were no significant relationships between vitamin D and lung function decline with the exception of an inverse relationship between VDC and FVC decline

|                 | Vitamin D Deficiency |         |              |         | Vitamin D Continuous |         |              |         |
|-----------------|----------------------|---------|--------------|---------|----------------------|---------|--------------|---------|
|                 | Bivariate            |         | Multivariate |         | Bivariate            |         | Multivariate |         |
|                 | $\beta$              | p value | $\beta$      | p value | $\beta$              | p value | $\beta$      | p value |
| <b>FEV1</b>     | -0.00039             | 0.88    | 0.0021       | 0.39    | -0.00008             | 0.46    | -0.00019     | 0.06    |
| <b>FVC</b>      | 0.002                | 0.48    | 0.0044       | 0.11    | -0.00025             | 0.023   | -0.00035     | 0.0008  |
| <b>FEV1/FVC</b> | -0.057               | 0.23    | -0.046       | 0.37    | 0.0031               | 0.09    | 0.00216      | 0.25    |

**Table E4: Cross-sectional analysis, vitamin D deficiency and smoking (pack-years) in relation to lung function (Times 1-3)**

Effect estimates ( $\beta$ ) are for the interaction between VDD and smoking as labeled at the top of the column, i.e. either VDD x pack-years or VDD x smoking status. Smoking status was analyzed as a dichotomous variable (current vs. ex- and never-smokers). Reference group is never & ex-smokers.

|               |                            | Pack-years |         | Smoking Status |         |
|---------------|----------------------------|------------|---------|----------------|---------|
|               |                            | $\beta$    | p value | $\beta$        | p value |
| <b>Time 1</b> | <b>FEV<sub>1</sub></b>     | -0.0019    | 0.3     | -0.201         | 0.143   |
|               | <b>FVC</b>                 | -0.0017    | 0.53    | -0.148         | 0.33    |
|               | <b>FEV<sub>1</sub>/FVC</b> | -0.0225    | 0.35    | -2.23          | 0.21    |
| <b>Time 2</b> | <b>FEV<sub>1</sub></b>     | -0.002     | 0.43    | -0.525         | 0.016   |
|               | <b>FVC</b>                 | -0.0648    | 0.43    | -0.584         | 0.016   |
|               | <b>FEV<sub>1</sub>/FVC</b> | -0.021     | 0.53    | -3.524         | 0.23    |
| <b>Time 3</b> | <b>FEV<sub>1</sub></b>     | -0.0072    | 0.0007  | -0.888         | 0.0001  |
|               | <b>FVC</b>                 | -0.0055    | 0.0211  | -0.64          | 0.013   |
|               | <b>FEV<sub>1</sub>/FVC</b> | -0.0938    | 0.0039  | -14.491        | <.0001  |

**Table E5: Cross-sectional analysis, vitamin D continuous and smoking (pack-years) in relation to lung function**

Effect estimates ( $\beta$ ) are for the interaction term between vitamin D as a continuous variable (VDC) and smoking (pack-years). Positive values imply incremental increase in lung function value for each 1ng/ml increase in vitamin D level.

|               |                            | $\beta$  | p value |
|---------------|----------------------------|----------|---------|
| <b>Time 1</b> | <b>FEV<sub>1</sub></b>     | 0.00014  | 0.19    |
|               | <b>FVC</b>                 | 0.000038 | 0.74    |
|               | <b>FEV<sub>1</sub>/FVC</b> | 0.0024   | 0.08    |
| <b>Time 2</b> | <b>FEV<sub>1</sub></b>     | 0.00008  | 0.32    |
|               | <b>FVC</b>                 | 0.0001   | 0.3     |
|               | <b>FEV<sub>1</sub>/FVC</b> | 0.0005   | 0.65    |
| <b>Time 3</b> | <b>FEV<sub>1</sub></b>     | 0.00016  | 0.1     |
|               | <b>FVC</b>                 | 0.00015  | 0.14    |
|               | <b>FEV<sub>1</sub>/FVC</b> | 0.00086  | 0.55    |

**Table E6: Longitudinal Analysis showing effect of combination of vitamin D deficiency, smoking status, and change in lung function over time**

Effect estimates and p values are for the interaction term with vitamin D deficiency, time (in years) and smoking status. Negative effect estimates imply that in current smokers with vitamin D deficiency, lung function decline was more rapid as compared to current smokers who were vitamin D sufficient.

|                 | <b>Smoking Status</b> |         |
|-----------------|-----------------------|---------|
|                 | $\beta$               | p value |
| <b>FEV1</b>     | -0.026                | 0.052   |
| <b>FVC</b>      | -0.009                | 0.54    |
| <b>FEV1/FVC</b> | -0.76                 | 0.023   |

**Table E7: Longitudinal Analysis showing effect of combination of vitamin D as continuous variable, pack-years of smoking, and change in lung function over time.**

Effect estimates and p values are for the interaction term with vitamin D as a continuous variable, time (in years), and pack-years of smoking. Positive effect estimates imply an incremental decrease in rate of decline (rate becomes less negative) per year per ng/ml increase in vitamin D level.

|                 | $\beta$ | p value |
|-----------------|---------|---------|
| <b>FEV1</b>     | 7.5E-06 | 0.07    |
| <b>FVC</b>      | 8E-06   | 0.15    |
| <b>FEV1/FVC</b> | 0.00002 | 0.85    |

**Figure E1: Relationship between FEV<sub>1</sub> and pack-years of smoking**

There was a significant inverse relationship between FEV<sub>1</sub> and pack years of smoking

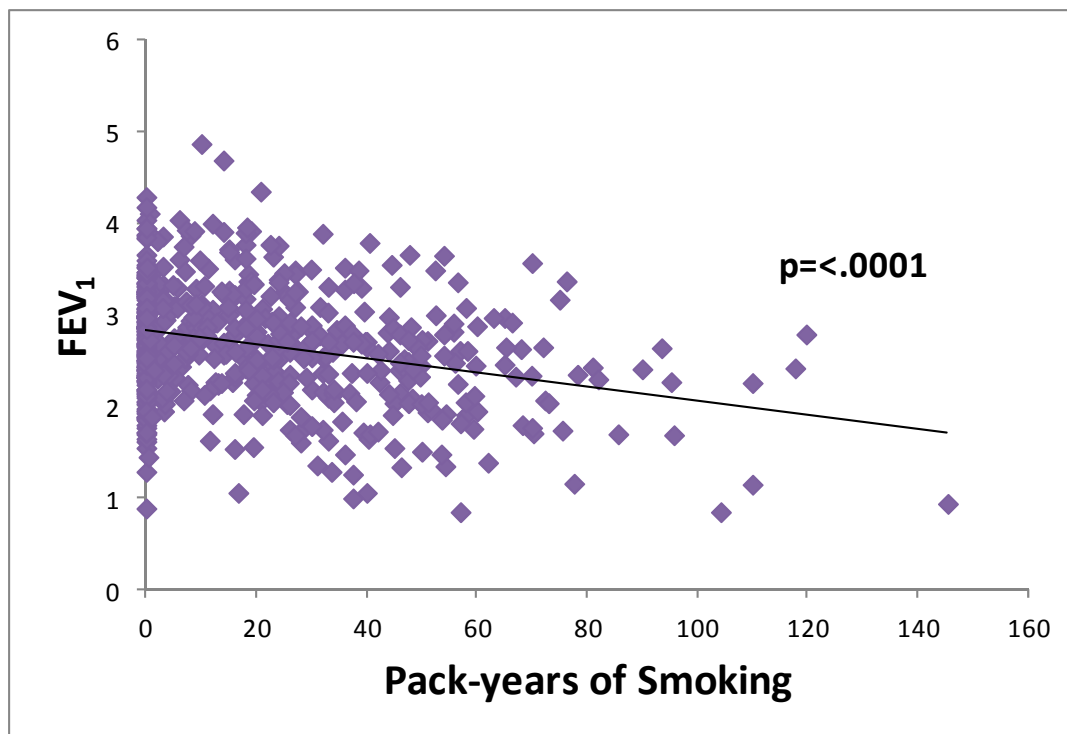

**Figure E2: Relationship between lung function and vitamin D levels**

There was no significant relationship between vitamin D levels and A) FEV<sub>1</sub>, B) FVC or C) FEV<sub>1</sub>/FVC.

**A)**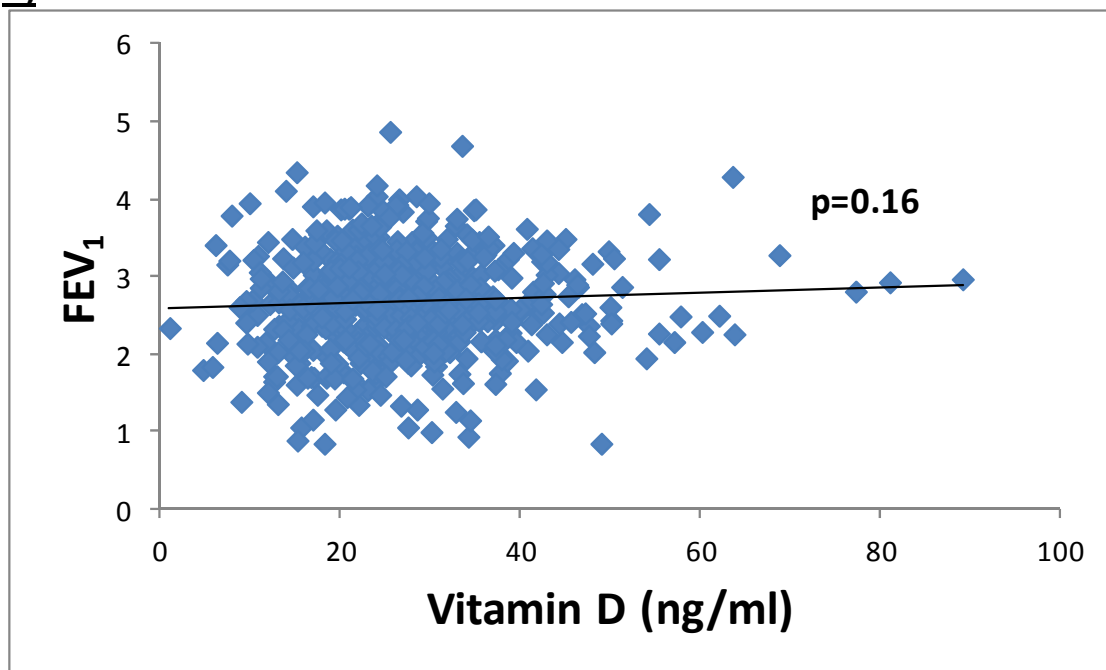**B)**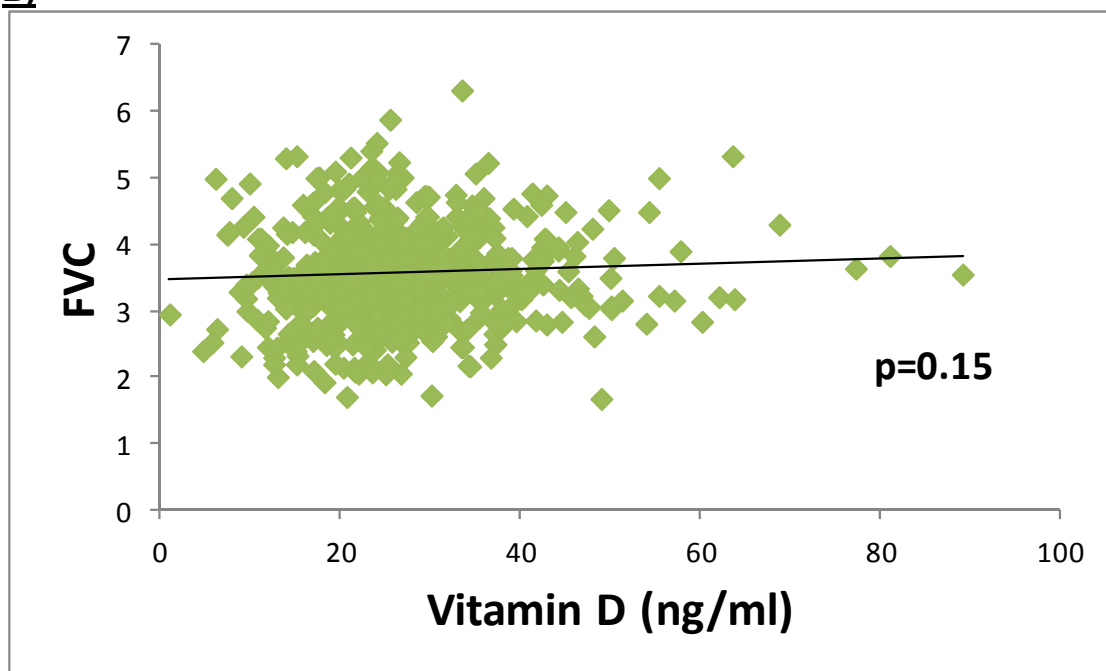**C)**

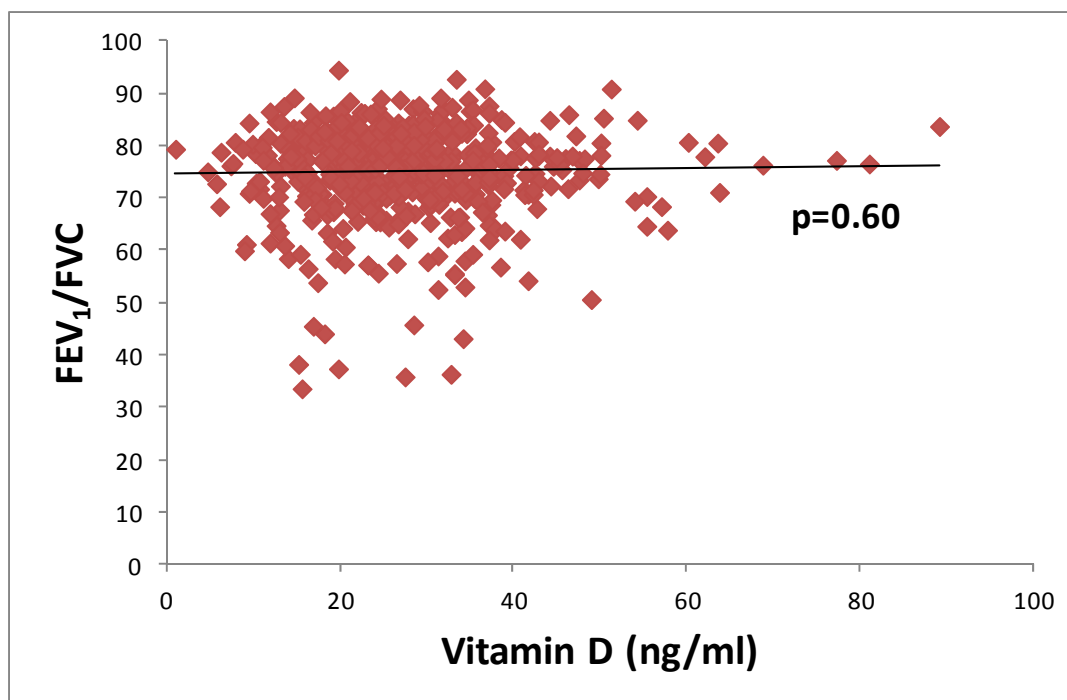

**Figure E3: Relationship between vitamin D (continuous) and rates of change in lung function**

There was no significant relationship between vitamin D levels and rate of change of FEV<sub>1</sub> or FEV<sub>1</sub>/FVC, however there was a significant inverse relationship between vitamin D and rate of change of FVC (see **Table E3**) though the effect size was very small ( $\beta=-.00035$ ,  $p=.0008$  in adjusted model). Shown here are the bivariate relationships between vitamin D levels and lung function decline.



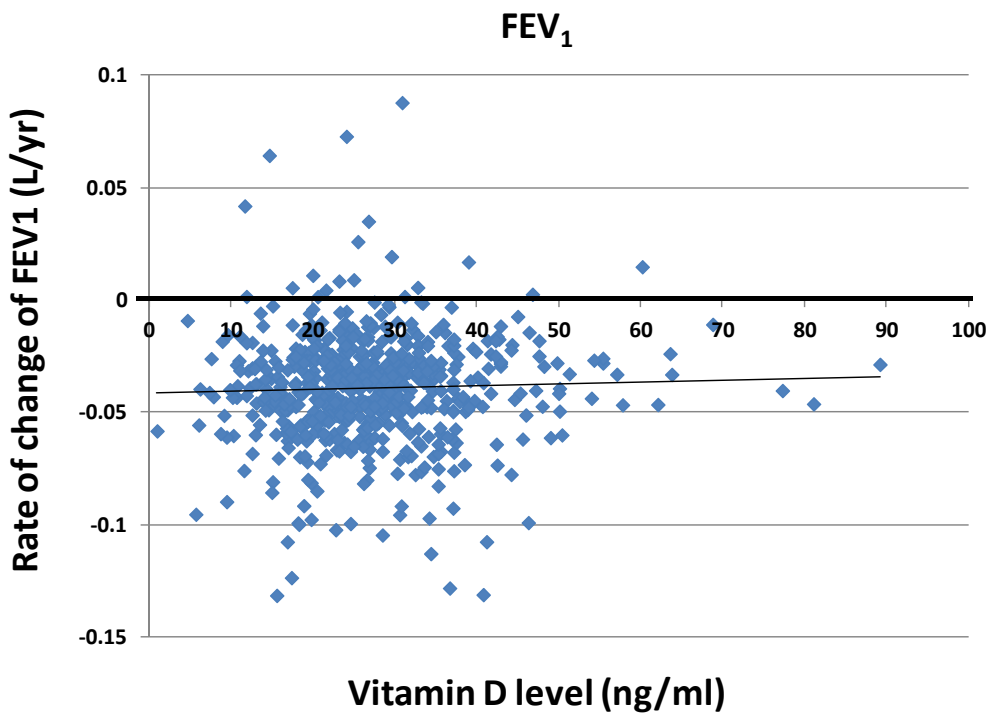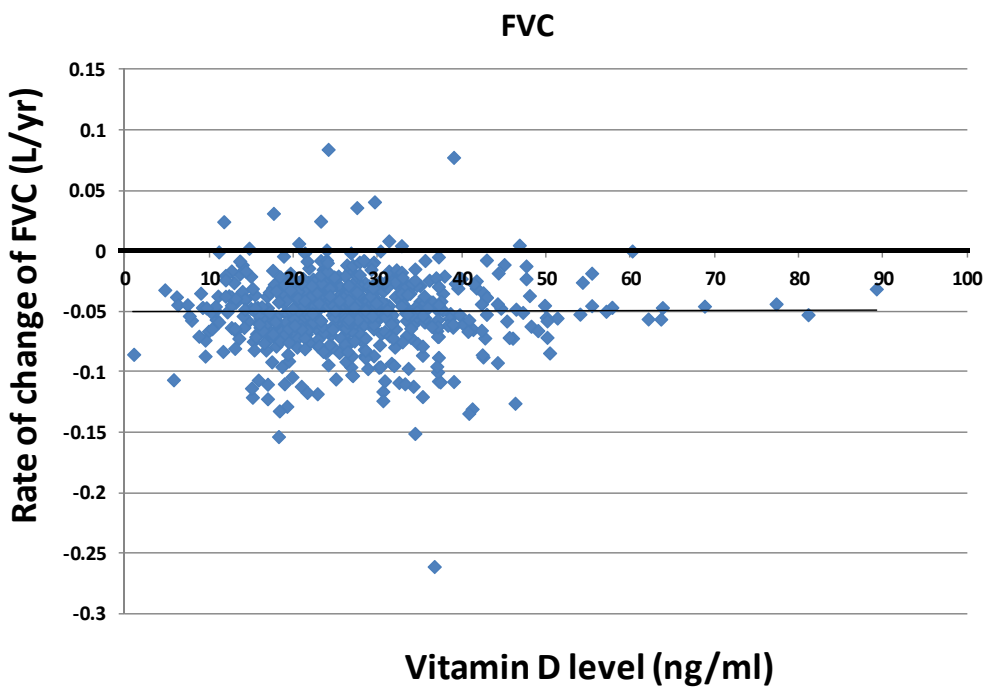

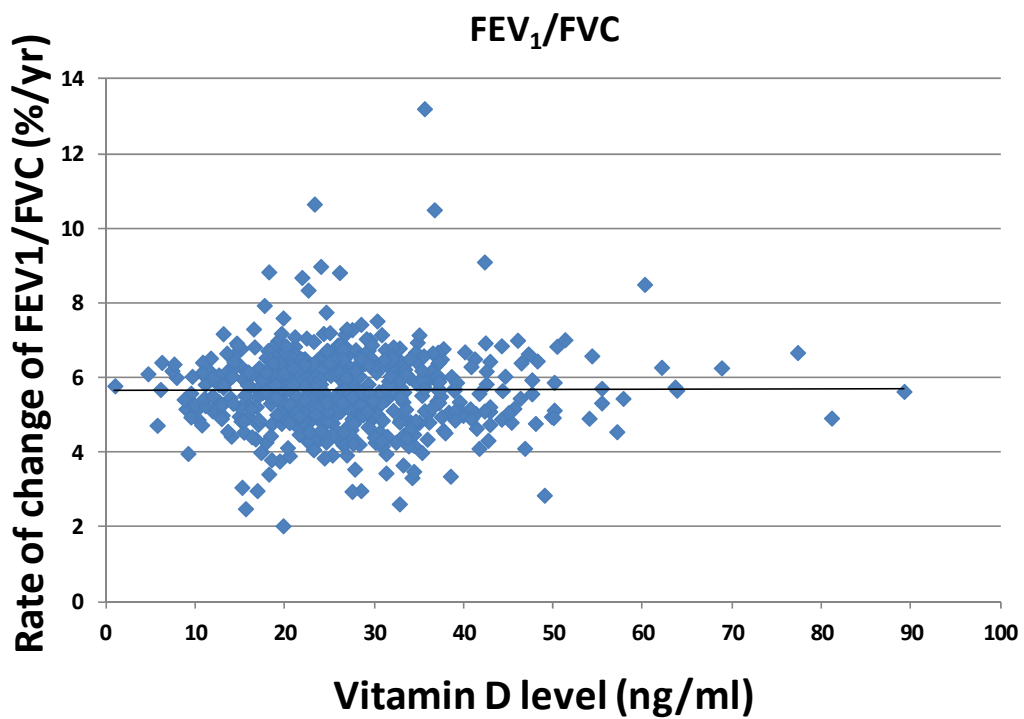

### Figure E4: Relationship between Lung Function, Vitamin D deficiency, and Smoking Status

Shown here is the cross-sectional relationship between lung function (FEV<sub>1</sub>% predicted) and smoking status.

In current smokers, the mean FEV<sub>1</sub>% predicted was significantly lower in those who were vitamin D deficient, compared to those who were not. In ex and non-smokers, there was no significant difference between subjects with and without vitamin D deficiency.

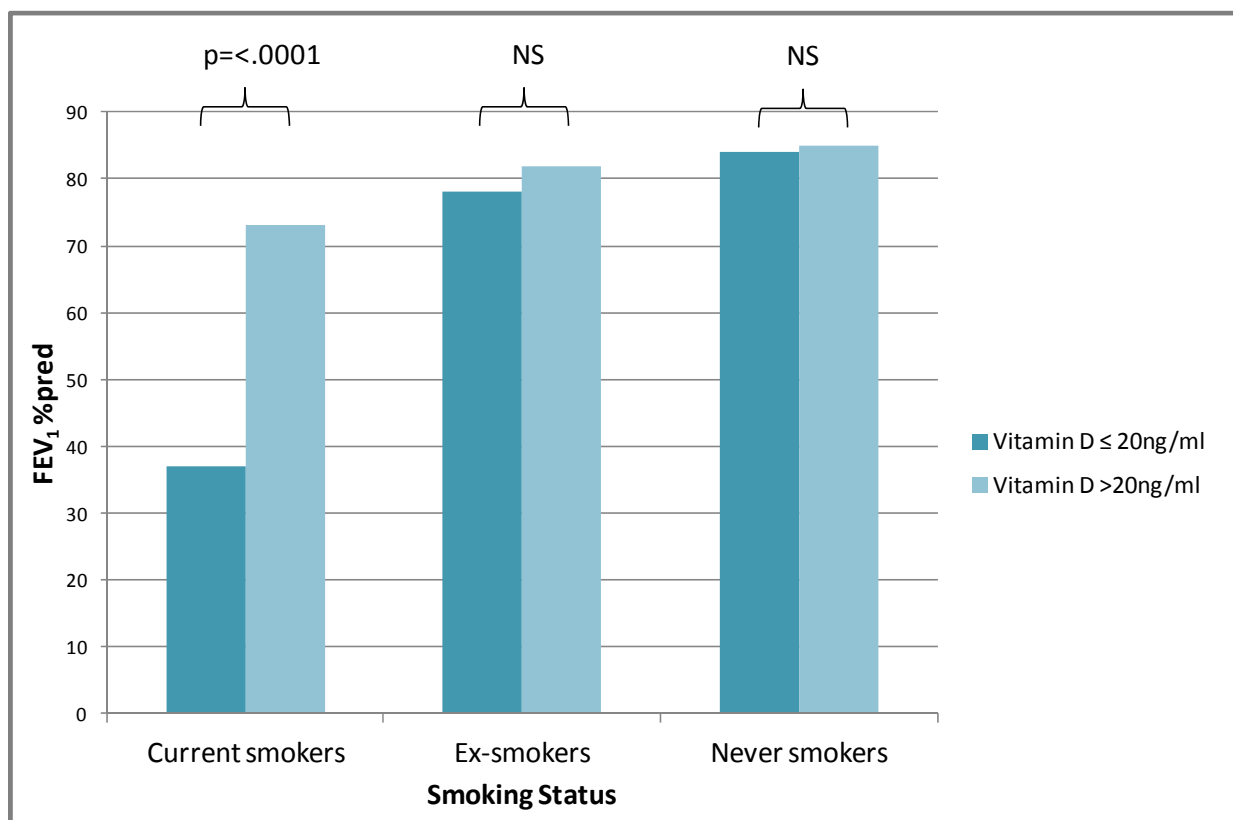

Supplement: supp_186.7.616_Lange_ODS.pdf [file supp_186.7.616_Lange_ODS.pdf]
